# Supplementary material for: Radiation Shielding Tests of Crosslinked Polystyrene-b-Polyethyleneglycol Block Copolymers Blended with Nanostructured Selenium Dioxide and Boron Nitride Particles
Source: MDPI journal article supplement (doi:10.3390/nano12030297), 2022-01-18
Supplement: s1 [file s1]

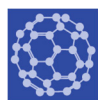

# Supplementary Materials

## Radiation Shielding Tests of Crosslinked Polystyrene-*b*-Polyethyleneglycol Block Copolymers Blended with Nanostructured Selenium Dioxide and Boron Nitride Particles

Zehra Merve Cinan <sup>1</sup>, Burcu Erol <sup>2</sup>, Taylan Baskan <sup>1</sup>, Saliha Mutlu <sup>3</sup>, Bülend Ortaç <sup>4</sup>, Sevil Savaskan Yilmaz <sup>3</sup> and Ahmet Hakan Yilmaz <sup>1,\*</sup>

<sup>1</sup> Faculty of Sciences, Department of Physics, Karadeniz Technical University, Trabzon 61080, Turkey; m\_cinan@ktu.edu.tr (Z.M.C.); taylanbaskan@ktu.edu.tr (T.B.)

<sup>2</sup> Faculty of Arts and Sciences, Department of Physics, Recep Tayyip Erdoğan University, Rize 53100, Turkey; burcu.karayunus@erdogan.edu.tr

<sup>3</sup> Faculty of Sciences, Department of Chemistry, Karadeniz Technical University, Trabzon 61080, Turkey; salihmutlu@ktu.edu.tr (S.M.); sevily@ktu.edu.tr (S.S.Y.)

<sup>4</sup> National Nanotechnology Research Center and Institute of Materials Science and Nanotechnology, Bilkent University, Ankara 06800, Turkey; ortac@unam.bilkent.edu.tr

\* Correspondence: Correspondence: hakany@ktu.edu.tr; Tel.: +90-542-385-9893

### S1. Thermogravimetric Analysis (TGA) Outcomes of the PS-*b*-PEG Copolymers Blended with the Nanostructured SeO<sub>2</sub> and BN Particles, and the Pure Nanostructured SeO<sub>2</sub> and BN Particles

**Table S1.** TGA outputs of the PS-*b*-PEG copolymers blended with the nanostructured SeO<sub>2</sub> and BN particles, and the pure nanostructured SeO<sub>2</sub> and BN particles.

| PSNC4            |        | PSNC9            |        | PSNC14           |        |
|------------------|--------|------------------|--------|------------------|--------|
| Temperature (°C) | wt (%) | Temperature (°C) | wt (%) | Temperature (°C) | wt (%) |
| 76.2             | 96.9   | 73.1             | 95.1   | 50.4             | 97.9   |
| 122.6            | 87.5   | 122.8            | 91.5   | 121.6            | 88.2   |
| 251.4            | 83.0   | 203.0            | 87.0   | 217.7            | 82.6   |
| 294.3            | 37.1   | 246.5            | 75.3   | 252.7            | 66.8   |
| 469.0            | 14.8   | 322.0            | 70.7   | 324.5            | 58.1   |
| 662.0            | 6.7    | 419.6            | 23.7   | 451.8            | 9.1    |
| -                | -      | 565.9            | 18.7   | 606.6            | -0.6   |
| -                | -      | 631.5            | 8.2    | -                | -      |
| PBSNC2           |        | PBSNC6           |        | PBSNC10          |        |
| Temperature (°C) | wt (%) | Temperature (°C) | wt (%) | Temperature (°C) | wt (%) |
| 45.7             | 98.4   | 67.6             | 96.0   | 85.0             | 95.1   |
| 82.8             | 91.2   | 103.8            | 89.0   | 138.2            | 85.2   |
| 203.0            | 83.7   | 214.9            | 84.4   | 222.0            | 81.8   |
| 277.7            | 59.6   | 281.5            | 47.8   | 302.2            | 21.8   |
| 452.1            | 45.0   | 457.7            | 15.8   | 434.1            | 12.3   |
| 658.4            | 40.8   | 667.0            | 14.1   | 565.2            | 10.3   |
| SeO <sub>2</sub> |        | BN               |        |                  |        |
| Temperature (°C) | wt (%) | Temperature (°C) | wt (%) |                  |        |

|       |       |       |      |
|-------|-------|-------|------|
| 78.3  | 99.8  | 45.3  | 95.1 |
| 318.1 | 99.7  | 46.0  | 83.9 |
| 516.6 | −36.9 | 84.1  | 58.0 |
| 661.6 | −36.7 | 431.7 | 57.7 |
| -     | -     | 624.6 | 57.4 |

## S2. Gamma Irradiation Results

### S2.1. Linear ( $\mu_L$ ) and Mass Attenuation ( $\mu_m$ ) Coefficients

**Table S2.** The  $\mu_L$  rates of the PS-b-PEG copolymers blended with the nanostructured SeO<sub>2</sub> particles.

| NC Label     | PSNC1             |       | PSNC2  |       | PSNC3  |       | PSNC4  |       | PSNC5  |       |
|--------------|-------------------|-------|--------|-------|--------|-------|--------|-------|--------|-------|
| Energy (keV) | $\mu_L (cm^{-1})$ |       |        |       |        |       |        |       |        |       |
|              | EXP.              | THEO. | EXP.   | THEO. | EXP.   | THEO. | EXP.   | THEO. | EXP.   | THEO. |
| 121.782      | 0.241             | 0.274 | 0.557  | 0.462 | 0.357  | 0.629 | 0.543  | 0.767 | 0.757  | 0.786 |
| 344.279      | 0.203             | 0.193 | 0.154  | 0.203 | 0.311  | 0.238 | 0.223  | 0.254 | 0.290  | 0.334 |
| 778.904      | 0.141             | 0.137 | 0.178  | 0.137 | 0.193  | 0.158 | 0.191  | 0.166 | 0.225  | 0.226 |
| 964.079      | 0.100             | 0.123 | 0.170  | 0.124 | 0.112  | 0.142 | 0.184  | 0.149 | 0.146  | 0.204 |
| 1085.869     | 0.094             | 0.116 | 0.129  | 0.117 | 0.178  | 0.134 | 0.152  | 0.140 | 0.150  | 0.192 |
| 1112.074     | 0.082             | 0.115 | 0.145  | 0.115 | 0.169  | 0.132 | 0.150  | 0.138 | 0.154  | 0.189 |
| 1408.006     | 0.082             | 0.102 | 0.103  | 0.102 | 0.118  | 0.117 | 0.126  | 0.123 | 0.094  | 0.168 |
| NC Label     | PSNC6             |       | PSNC7  |       | PSNC8  |       | PSNC9  |       | PSNC10 |       |
| Energy (keV) | $\mu_L (cm^{-1})$ |       |        |       |        |       |        |       |        |       |
|              | EXP.              | THEO. | EXP.   | THEO. | EXP.   | THEO. | EXP.   | THEO. | EXP.   | THEO. |
| 121.782      | 0.282             | 0.250 | 0.589  | 0.629 | 0.340  | 0.574 | 0.412  | 0.889 | 0.268  | 0.398 |
| 344.279      | 0.193             | 0.176 | 0.365  | 0.276 | 0.236  | 0.217 | 0.277  | 0.294 | 0.209  | 0.169 |
| 778.904      | 0.141             | 0.124 | 0.131  | 0.187 | 0.110  | 0.144 | 0.143  | 0.192 | 0.116  | 0.114 |
| 964.079      | 0.111             | 0.112 | 0.143  | 0.168 | 0.107  | 0.130 | 0.089  | 0.172 | 0.098  | 0.103 |
| 1085.869     | 0.085             | 0.106 | 0.135  | 0.159 | 0.131  | 0.122 | 0.194  | 0.162 | 0.117  | 0.097 |
| 1112.074     | 0.068             | 0.105 | 0.106  | 0.157 | 0.081  | 0.121 | 0.106  | 0.160 | 0.099  | 0.096 |
| 1408.006     | 0.062             | 0.093 | 0.107  | 0.139 | 0.065  | 0.107 | 0.065  | 0.142 | 0.096  | 0.085 |
| NC Label     | PSNC11            |       | PSNC12 |       | PSNC13 |       | PSNC14 |       | PSNC15 |       |
| Energy (keV) | $\mu_L (cm^{-1})$ |       |        |       |        |       |        |       |        |       |
|              | EXP.              | THEO. | EXP.   | THEO. | EXP.   | THEO. | EXP.   | THEO. | EXP.   | THEO. |
| 121.782      | 0.195             | 0.202 | 0.374  | 0.503 | 0.554  | 1.121 | 0.487  | 0.690 | 0.467  | 0.647 |
| 344.279      | 0.172             | 0.142 | 0.149  | 0.220 | 0.593  | 0.423 | 0.328  | 0.228 | 0.295  | 0.275 |
| 778.904      | 0.078             | 0.100 | 0.177  | 0.150 | 0.387  | 0.282 | 0.127  | 0.149 | 0.134  | 0.186 |
| 964.079      | 0.085             | 0.091 | 0.134  | 0.135 | 0.227  | 0.254 | 0.116  | 0.134 | 0.095  | 0.168 |
| 1085.869     | 0.068             | 0.086 | 0.141  | 0.127 | 0.276  | 0.239 | 0.150  | 0.126 | 0.185  | 0.158 |
| 1112.074     | 0.062             | 0.085 | 0.134  | 0.125 | 0.219  | 0.236 | 0.135  | 0.124 | 0.163  | 0.156 |
| 1408.006     | 0.049             | 0.075 | 0.064  | 0.111 | 0.174  | 0.209 | 0.139  | 0.110 | 0.084  | 0.138 |

**Table S3.** The  $\mu_L$  rates of the PS-b-PEG copolymers blended with the nanostructured SeO<sub>2</sub> and BN particles.

| NC Label     | PBSNC1            |       | PBSNC2 |       | PBSNC3 |       | PBSNC4 |       |
|--------------|-------------------|-------|--------|-------|--------|-------|--------|-------|
|              | $\mu_L (cm^{-1})$ |       |        |       |        |       |        |       |
| Energy (keV) | EXP.              | THEO. | EXP.   | THEO. | EXP.   | THEO. | EXP.   | THEO. |
| 121.782      | 0.362             | 0.213 | 0.688  | 0.889 | 0.929  | 0.852 | 0.764  | 0.674 |
| 344.279      | 0.087             | 0.150 | 0.271  | 0.333 | 0.261  | 0.281 | 0.227  | 0.269 |
| 778.904      | 0.089             | 0.106 | 0.252  | 0.222 | 0.227  | 0.183 | 0.199  | 0.181 |

|              |                    |       |         |       |         |       |         |       |
|--------------|--------------------|-------|---------|-------|---------|-------|---------|-------|
| 964.079      | 0.079              | 0.096 | 0.211   | 0.199 | 0.172   | 0.165 | 0.151   | 0.163 |
| 1085.869     | 0.074              | 0.091 | 0.222   | 0.188 | 0.159   | 0.155 | 0.148   | 0.153 |
| 1112.074     | 0.058              | 0.089 | 0.211   | 0.185 | 0.146   | 0.153 | 0.125   | 0.152 |
| 1408.006     | 0.038              | 0.079 | 0.154   | 0.164 | 0.063   | 0.136 | 0.073   | 0.134 |
| NC Label     | PBSNC5             |       | PBSNC6  |       | PBSNC7  |       | PBSNC8  |       |
| Energy (keV) | $\mu_L\,(cm^{-1})$ |       |         |       |         |       |         |       |
|              | EXP.               | THEO. | EXP.    | THEO. | EXP.    | THEO. | EXP.    | THEO. |
| 121.782      | 0.260              | 0.250 | 0.492   | 0.565 | 0.756   | 0.816 | 0.534   | 0.541 |
| 344.279      | 0.220              | 0.176 | 0.303   | 0.212 | 0.179   | 0.269 | 0.169   | 0.217 |
| 778.904      | 0.134              | 0.125 | 0.127   | 0.141 | 0.170   | 0.176 | 0.172   | 0.145 |
| 964.079      | 0.119              | 0.113 | 0.127   | 0.127 | 0.094   | 0.158 | 0.140   | 0.131 |
| 1085.869     | 0.118              | 0.106 | 0.131   | 0.119 | 0.174   | 0.148 | 0.120   | 0.123 |
| 1112.074     | 0.114              | 0.105 | 0.129   | 0.118 | 0.101   | 0.147 | 0.091   | 0.122 |
| 1408.006     | 0.089              | 0.093 | 0.089   | 0.104 | 0.041   | 0.130 | 0.076   | 0.108 |
| NC Label     | PBSNC9             |       | PBSNC10 |       | PBSNC11 |       | PBSNC12 |       |
| Energy (keV) | $\mu_L\,(cm^{-1})$ |       |         |       |         |       |         |       |
|              | EXP.               | THEO. | EXP.    | THEO. | EXP.    | THEO. | EXP.    | THEO. |
| 121.782      | 0.186              | 0.204 | 0.823   | 0.881 | 0.973   | 0.901 | 0.809   | 0.719 |
| 344.279      | 0.123              | 0.141 | 0.479   | 0.330 | 0.195   | 0.297 | 0.419   | 0.288 |
| 778.904      | 0.104              | 0.099 | 0.235   | 0.219 | 0.194   | 0.194 | 0.282   | 0.193 |
| 964.079      | 0.080              | 0.090 | 0.216   | 0.197 | 0.163   | 0.174 | 0.194   | 0.174 |
| 1085.869     | 0.087              | 0.085 | 0.210   | 0.186 | 0.203   | 0.164 | 0.199   | 0.164 |
| 1112.074     | 0.080              | 0.084 | 0.168   | 0.184 | 0.196   | 0.162 | 0.191   | 0.162 |
| 1408.006     | 0.069              | 0.074 | 0.096   | 0.163 | 0.076   | 0.143 | 0.124   | 0.143 |

**Table S4.** The  $\mu_m$  rates of the PS-b-PEG copolymers blended with the nanostructured SeO<sub>2</sub> particles.

| NC Label     | PSNC1            |       | PSNC2  |       | PSNC3  |       | PSNC4  |       | PSNC5  |       |       |
|--------------|------------------|-------|--------|-------|--------|-------|--------|-------|--------|-------|-------|
| Energy (keV) | $\mu_m (cm^2/g)$ |       |        |       |        |       |        |       |        |       |       |
|              | EXP.             | THEO. | EXP.   | THEO. | EXP.   | THEO. | EXP.   | THEO. | EXP.   | THEO. |       |
|              | 121.782          | 0.235 | 0.268  | 0.333 | 0.277  | 0.142 | 0.251  | 0.260 | 0.368  | 0.364 | 0.379 |
|              | 344.279          | 0.198 | 0.188  | 0.092 | 0.121  | 0.124 | 0.095  | 0.107 | 0.122  | 0.140 | 0.161 |
|              | 778.904          | 0.137 | 0.133  | 0.107 | 0.082  | 0.077 | 0.063  | 0.091 | 0.079  | 0.108 | 0.109 |
|              | 964.079          | 0.098 | 0.120  | 0.102 | 0.074  | 0.045 | 0.057  | 0.088 | 0.071  | 0.071 | 0.098 |
|              | 1085.869         | 0.092 | 0.114  | 0.077 | 0.070  | 0.071 | 0.053  | 0.073 | 0.067  | 0.072 | 0.092 |
|              | 1112.074         | 0.080 | 0.112  | 0.087 | 0.069  | 0.067 | 0.053  | 0.072 | 0.066  | 0.075 | 0.091 |
|              | 1408.006         | 0.080 | 0.099  | 0.062 | 0.061  | 0.047 | 0.047  | 0.060 | 0.059  | 0.045 | 0.081 |
| NC Label     | PSNC6            |       | PSNC7  |       | PSNC8  |       | PSNC9  |       | PSNC10 |       |       |
| Energy (keV) | $\mu_m (cm^2/g)$ |       |        |       |        |       |        |       |        |       |       |
|              | EXP.             | THEO. | EXP.   | THEO. | EXP.   | THEO. | EXP.   | THEO. | EXP.   | THEO. |       |
|              | 121.782          | 0.283 | 0.251  | 0.228 | 0.244  | 0.222 | 0.376  | 0.268 | 0.579  | 0.229 | 0.339 |
|              | 344.279          | 0.194 | 0.176  | 0.142 | 0.107  | 0.155 | 0.142  | 0.180 | 0.191  | 0.178 | 0.144 |
|              | 778.904          | 0.141 | 0.125  | 0.051 | 0.072  | 0.072 | 0.095  | 0.093 | 0.125  | 0.099 | 0.097 |
|              | 964.079          | 0.111 | 0.113  | 0.055 | 0.065  | 0.070 | 0.085  | 0.058 | 0.112  | 0.083 | 0.088 |
|              | 1085.869         | 0.086 | 0.106  | 0.052 | 0.062  | 0.086 | 0.080  | 0.127 | 0.106  | 0.099 | 0.083 |
|              | 1112.074         | 0.068 | 0.105  | 0.041 | 0.061  | 0.053 | 0.079  | 0.069 | 0.104  | 0.085 | 0.082 |
|              | 1408.006         | 0.062 | 0.093  | 0.042 | 0.054  | 0.043 | 0.070  | 0.043 | 0.093  | 0.082 | 0.072 |
| NC Label     | PSNC11           |       | PSNC12 |       | PSNC13 |       | PSNC14 |       | PSNC15 |       |       |
| Energy (keV) | $\mu_m (cm^2/g)$ |       |        |       |        |       |        |       |        |       |       |
|              | EXP.             | THEO. | EXP.   | THEO. | EXP.   | THEO. | EXP.   | THEO. | EXP.   | THEO. |       |

|          |       |       |       |       |       |       |       |       |       |       |
|----------|-------|-------|-------|-------|-------|-------|-------|-------|-------|-------|
| 121.782  | 0.177 | 0.184 | 0.297 | 0.399 | 0.218 | 0.442 | 0.263 | 0.372 | 0.301 | 0.417 |
| 344.279  | 0.156 | 0.129 | 0.118 | 0.175 | 0.234 | 0.167 | 0.177 | 0.123 | 0.190 | 0.178 |
| 778.904  | 0.071 | 0.091 | 0.140 | 0.119 | 0.152 | 0.111 | 0.069 | 0.080 | 0.087 | 0.120 |
| 964.079  | 0.077 | 0.083 | 0.107 | 0.107 | 0.089 | 0.099 | 0.062 | 0.072 | 0.061 | 0.108 |
| 1085.869 | 0.062 | 0.078 | 0.112 | 0.101 | 0.109 | 0.094 | 0.081 | 0.068 | 0.119 | 0.102 |
| 1112.074 | 0.057 | 0.077 | 0.106 | 0.100 | 0.086 | 0.093 | 0.073 | 0.067 | 0.105 | 0.101 |
| 1408.006 | 0.044 | 0.068 | 0.051 | 0.088 | 0.068 | 0.082 | 0.075 | 0.059 | 0.054 | 0.089 |

**Table S5.** The  $\mu_m$  rates of the PS-b-PEG copolymers blended with the nanostructured SeO<sub>2</sub> and BN particles.

| NC Label     | PBSNC1           |       | PBSNC2  |       | PBSNC3  |       | PBSNC4  |       |
|--------------|------------------|-------|---------|-------|---------|-------|---------|-------|
| Energy (keV) | $\mu_m (cm^2/g)$ |       |         |       |         |       |         |       |
|              | EXP.             | THEO. | EXP.    | THEO. | EXP.    | THEO. | EXP.    | THEO. |
| 121.782      | 0.293            | 0.173 | 0.269   | 0.348 | 0.361   | 0.331 | 0.389   | 0.344 |
| 344.279      | 0.070            | 0.122 | 0.106   | 0.131 | 0.101   | 0.109 | 0.116   | 0.138 |
| 778.904      | 0.072            | 0.086 | 0.099   | 0.087 | 0.088   | 0.071 | 0.102   | 0.093 |
| 964.079      | 0.064            | 0.078 | 0.083   | 0.078 | 0.067   | 0.064 | 0.077   | 0.083 |
| 1085.869     | 0.060            | 0.073 | 0.087   | 0.074 | 0.062   | 0.060 | 0.076   | 0.078 |
| 1112.074     | 0.047            | 0.073 | 0.083   | 0.073 | 0.056   | 0.060 | 0.064   | 0.077 |
| 1408.006     | 0.030            | 0.064 | 0.060   | 0.064 | 0.024   | 0.053 | 0.037   | 0.069 |
| NC Label     | PBSNC5           |       | PBSNC6  |       | PBSNC7  |       | PBSNC8  |       |
| Energy (keV) | $\mu_m (cm^2/g)$ |       |         |       |         |       |         |       |
|              | EXP.             | THEO. | EXP.    | THEO. | EXP.    | THEO. | EXP.    | THEO. |
| 121.782      | 0.151            | 0.145 | 0.242   | 0.278 | 0.515   | 0.556 | 0.263   | 0.267 |
| 344.279      | 0.128            | 0.103 | 0.149   | 0.104 | 0.122   | 0.183 | 0.083   | 0.107 |
| 778.904      | 0.078            | 0.073 | 0.062   | 0.069 | 0.116   | 0.119 | 0.085   | 0.072 |
| 964.079      | 0.069            | 0.066 | 0.063   | 0.062 | 0.064   | 0.108 | 0.069   | 0.065 |
| 1085.869     | 0.068            | 0.062 | 0.065   | 0.059 | 0.118   | 0.101 | 0.059   | 0.061 |
| 1112.074     | 0.066            | 0.061 | 0.063   | 0.058 | 0.069   | 0.099 | 0.045   | 0.060 |
| 1408.006     | 0.052            | 0.054 | 0.044   | 0.051 | 0.028   | 0.088 | 0.037   | 0.053 |
| NC Label     | PBSNC9           |       | PBSNC10 |       | PBSNC11 |       | PBSNC12 |       |
| Energy (keV) | $\mu_m (cm^2/g)$ |       |         |       |         |       |         |       |
|              | EXP.             | THEO. | EXP.    | THEO. | EXP.    | THEO. | EXP.    | THEO. |
| 121.782      | 0.142            | 0.156 | 0.329   | 0.353 | 0.405   | 0.375 | 0.329   | 0.293 |
| 344.279      | 0.094            | 0.108 | 0.192   | 0.132 | 0.081   | 0.124 | 0.171   | 0.117 |
| 778.904      | 0.079            | 0.076 | 0.094   | 0.088 | 0.081   | 0.081 | 0.115   | 0.079 |
| 964.079      | 0.061            | 0.069 | 0.086   | 0.079 | 0.068   | 0.073 | 0.079   | 0.071 |
| 1085.869     | 0.067            | 0.065 | 0.084   | 0.074 | 0.084   | 0.068 | 0.081   | 0.067 |
| 1112.074     | 0.061            | 0.064 | 0.067   | 0.074 | 0.081   | 0.067 | 0.078   | 0.066 |
| 1408.006     | 0.052            | 0.057 | 0.039   | 0.065 | 0.032   | 0.059 | 0.050   | 0.058 |

## S2.2. Half-Value Layer (HVL), Tenth Value Layer (TVL), Mean Free Path (MFP), and Radiation Protection Efficiency (RPE)

**Table S6.** The HVL and TVL rates of the PS-b-PEG copolymers blended with the nanostructured SeO<sub>2</sub> particles.

| NC Label     | PSNC1   |         | PSNC2   |         | PSNC3   |         | PSNC4   |         | PSNC5   |         |
|--------------|---------|---------|---------|---------|---------|---------|---------|---------|---------|---------|
| Energy (keV) | HVL(cm) | TVL(cm) |
| 121.782      | 2.881   | 9.569   | 1.245   | 4.137   | 1.940   | 6.445   | 1.276   | 4.240   | 0.916   | 3.043   |
| 344.279      | 3.421   | 11.364  | 4.505   | 14.964  | 2.228   | 7.400   | 3.109   | 10.328  | 2.387   | 7.928   |

| 778.904      | 4.930   | 16.376  | 3.887   | 12.911  | 3.601   | 11.961  | 3.634   | 12.072  | 3.079   | 10.228  |
|--------------|---------|---------|---------|---------|---------|---------|---------|---------|---------|---------|
| 964.079      | 6.926   | 23.008  | 4.080   | 13.554  | 6.201   | 20.600  | 3.775   | 12.542  | 4.762   | 15.820  |
| 1085.869     | 7.381   | 24.518  | 5.393   | 17.914  | 3.891   | 12.927  | 4.559   | 15.146  | 4.634   | 15.392  |
| 1112.074     | 8.432   | 28.010  | 4.780   | 15.879  | 4.109   | 13.649  | 4.636   | 15.400  | 4.499   | 14.946  |
| 1408.006     | 8.458   | 28.097  | 6.713   | 22.299  | 5.880   | 19.532  | 5.502   | 18.276  | 7.367   | 24.474  |
| NC Label     | PSNC6   |         | PSNC7   |         | PSNC8   |         | PSNC9   |         | PSNC10  |         |
| Energy (keV) | HVL(cm) | TVL(cm) |
| 121.782      | 2.457   | 8.162   | 1.178   | 3.913   | 2.042   | 6.782   | 1.684   | 5.594   | 2.583   | 8.579   |
| 344.279      | 3.592   | 11.934  | 1.897   | 6.302   | 2.936   | 9.754   | 2.503   | 8.314   | 3.324   | 11.041  |
| 778.904      | 4.929   | 16.375  | 5.280   | 17.540  | 6.295   | 20.911  | 4.866   | 16.164  | 5.974   | 19.844  |
| 964.079      | 6.243   | 20.739  | 4.852   | 16.117  | 6.468   | 21.485  | 7.825   | 25.994  | 7.088   | 23.547  |
| 1085.869     | 8.125   | 26.990  | 5.150   | 17.109  | 5.293   | 17.584  | 3.567   | 11.851  | 5.940   | 19.731  |
| 1112.074     | 10.209  | 33.913  | 6.520   | 21.660  | 8.607   | 28.593  | 6.515   | 21.643  | 6.973   | 23.162  |
| 1408.006     | 11.266  | 37.424  | 6.466   | 21.478  | 10.599  | 35.210  | 10.607  | 35.234  | 7.222   | 23.990  |
| NC Label     | PSNC11  |         | PSNC12  |         | PSNC13  |         | PSNC14  |         | PSNC15  |         |
| Energy (keV) | HVL(cm) | TVL(cm) |
| 121.782      | 3.563   | 11.837  | 1.853   | 6.157   | 1.251   | 4.156   | 1.422   | 4.724   | 1.484   | 4.930   |
| 344.279      | 4.032   | 13.393  | 4.647   | 15.436  | 1.169   | 3.882   | 2.113   | 7.018   | 2.348   | 7.800   |
| 778.904      | 8.936   | 29.683  | 3.928   | 13.047  | 1.791   | 5.949   | 5.439   | 18.068  | 5.167   | 17.165  |
| 964.079      | 8.146   | 27.061  | 5.158   | 17.136  | 3.060   | 10.167  | 6.000   | 19.933  | 7.280   | 24.185  |
| 1085.869     | 10.177  | 33.808  | 4.901   | 16.281  | 2.511   | 8.341   | 4.632   | 15.387  | 3.738   | 12.418  |
| 1112.074     | 11.104  | 36.886  | 5.185   | 17.226  | 3.172   | 10.535  | 5.127   | 17.032  | 4.254   | 14.132  |
| 1408.006     | 14.223  | 47.249  | 10.825  | 35.960  | 3.982   | 13.229  | 4.996   | 16.597  | 8.274   | 27.484  |

**Table S7.** The HVL and TVL rates of the PS-b-PEG copolymers blended with the nanostructured SeO<sub>2</sub> and BN particles.

| NC Label     | PBSNC1  |         | PBSNC2  |         | PBSNC3  |         | PBSNC4  |         |
|--------------|---------|---------|---------|---------|---------|---------|---------|---------|
| Energy (keV) | HVL(cm) | TVL(cm) | HVL(cm) | TVL(cm) | HVL(cm) | TVL(cm) | HVL(cm) | TVL(cm) |
| 121.782      | 1.917   | 6.367   | 1.008   | 3.348   | 0.746   | 2.478   | 0.908   | 3.015   |
| 344.279      | 7.976   | 26.495  | 2.563   | 8.513   | 2.660   | 8.835   | 3.048   | 10.125  |
| 778.904      | 7.807   | 25.936  | 2.749   | 9.131   | 3.056   | 10.153  | 3.477   | 11.549  |
| 964.079      | 8.735   | 29.018  | 3.280   | 10.897  | 4.043   | 13.429  | 4.578   | 15.208  |
| 1085.869     | 9.304   | 30.909  | 3.129   | 10.394  | 4.355   | 14.468  | 4.676   | 15.533  |
| 1112.074     | 11.866  | 39.417  | 3.282   | 10.902  | 4.764   | 15.826  | 5.540   | 18.405  |
| 1408.006     | 18.500  | 61.455  | 4.498   | 14.943  | 11.081  | 36.809  | 9.474   | 31.472  |
| NC Label     | PBSNC5  |         | PBSNC6  |         | PBSNC7  |         | PBSNC8  |         |
| Energy (keV) | HVL(cm) | TVL(cm) | HVL(cm) | TVL(cm) | HVL(cm) | TVL(cm) | HVL(cm) | TVL(cm) |
| 121.782      | 2.662   | 8.844   | 1.410   | 4.685   | 0.917   | 3.045   | 1.298   | 4.313   |
| 344.279      | 3.150   | 10.462  | 2.285   | 7.592   | 3.883   | 12.899  | 4.115   | 13.669  |
| 778.904      | 5.171   | 17.177  | 5.476   | 18.190  | 4.072   | 13.527  | 4.028   | 13.380  |
| 964.079      | 5.849   | 19.429  | 5.451   | 18.107  | 7.359   | 24.445  | 4.956   | 16.462  |
| 1085.869     | 5.872   | 19.505  | 5.280   | 17.541  | 3.987   | 13.245  | 5.764   | 19.147  |
| 1112.074     | 6.070   | 20.165  | 5.379   | 17.870  | 6.840   | 22.722  | 7.586   | 25.199  |
| 1408.006     | 7.801   | 25.913  | 7.804   | 25.925  | 16.841  | 55.945  | 9.128   | 30.323  |
| NC Label     | PBSNC9  |         | PBSNC10 |         | PBSNC11 |         | PBSNC12 |         |
| Energy (keV) | HVL(cm) | TVL(cm) | HVL(cm) | TVL(cm) | HVL(cm) | TVL(cm) | HVL(cm) | TVL(cm) |
| 121.782      | 3.721   | 12.359  | 0.843   | 2.799   | 0.712   | 2.367   | 0.850   | 2.847   |
| 344.279      | 5.616   | 18.656  | 1.447   | 4.805   | 3.551   | 11.797  | 1.655   | 5.498   |
| 778.904      | 6.649   | 22.086  | 2.953   | 9.809   | 3.567   | 11.849  | 2.462   | 8.180   |
| 964.079      | 8.689   | 28.863  | 3.216   | 10.685  | 4.251   | 14.121  | 3.583   | 11.903  |

|          |        |        |       |        |       |        |       |        |
|----------|--------|--------|-------|--------|-------|--------|-------|--------|
| 1085.869 | 7.957  | 26.433 | 3.295 | 10.946 | 3.415 | 11.345 | 3.468 | 11.520 |
| 1112.074 | 8.702  | 28.906 | 4.135 | 13.738 | 3.541 | 11.764 | 3.634 | 12.071 |
| 1408.006 | 10.112 | 33.592 | 7.203 | 23.929 | 9.074 | 30.142 | 5.601 | 18.606 |

**Table S8.** The MFP and RPE rates of the PS-b-PEG copolymers blended with the nanostructured SeO<sub>2</sub> particles.

| NC Label     | PSNC1   |        | PSNC2   |        | PSNC3   |        | PSNC4   |        | PSNC5   |        |
|--------------|---------|--------|---------|--------|---------|--------|---------|--------|---------|--------|
| Energy (keV) | MFP(cm) | RPE(%) |
| 121.782      | 4.156   | 10.219 | 1.797   | 19.825 | 2.799   | 11.216 | 1.842   | 15.356 | 1.322   | 21.030 |
| 344.279      | 4.935   | 8.678  | 6.499   | 5.926  | 3.214   | 9.843  | 4.485   | 6.615  | 3.443   | 8.663  |
| 778.904      | 7.112   | 6.105  | 5.607   | 6.835  | 5.195   | 6.209  | 5.243   | 5.687  | 4.442   | 6.783  |
| 964.079      | 9.993   | 4.384  | 5.887   | 6.522  | 8.947   | 3.654  | 5.447   | 5.481  | 6.871   | 4.440  |
| 1085.869     | 10.648  | 4.120  | 7.780   | 4.975  | 5.614   | 5.759  | 6.578   | 4.560  | 6.685   | 4.560  |
| 1112.074     | 12.164  | 3.616  | 6.896   | 5.594  | 5.928   | 5.463  | 6.688   | 4.487  | 6.491   | 4.693  |
| 1408.006     | 12.203  | 3.605  | 9.685   | 4.017  | 8.483   | 3.850  | 7.937   | 3.794  | 10.629  | 2.893  |
| NC Label     | PSNC6   |        | PSNC7   |        | PSNC8   |        | PSNC9   |        | PSNC10  |        |
| Energy (keV) | MFP(cm) | RPE(%) |
| 121.782      | 3.545   | 12.960 | 1.699   | 15.788 | 2.946   | 11.654 | 2.430   | 10.333 | 3.726   | 15.239 |
| 344.279      | 5.183   | 9.056  | 2.737   | 10.119 | 4.236   | 8.256  | 3.611   | 7.076  | 4.795   | 12.056 |
| 778.904      | 7.111   | 6.685  | 7.618   | 3.761  | 9.082   | 3.940  | 7.020   | 3.705  | 8.618   | 6.898  |
| 964.079      | 9.007   | 5.316  | 6.999   | 4.086  | 9.331   | 3.836  | 11.289  | 2.320  | 10.226  | 5.846  |
| 1085.869     | 11.722  | 4.111  | 7.430   | 3.854  | 7.637   | 4.667  | 5.147   | 5.019  | 8.569   | 6.936  |
| 1112.074     | 14.728  | 3.285  | 9.407   | 3.057  | 12.418  | 2.897  | 9.400   | 2.780  | 10.059  | 5.940  |
| 1408.006     | 16.253  | 2.982  | 9.328   | 3.082  | 15.291  | 2.359  | 15.302  | 1.717  | 10.419  | 5.741  |
| NC Label     | PSNC11  |        | PSNC12  |        | PSNC13  |        | PSNC14  |        | PSNC15  |        |
| Energy (keV) | MFP(cm) | RPE(%) |
| 121.782      | 5.141   | 11.241 | 2.674   | 12.760 | 1.805   | 9.842  | 2.052   | 15.314 | 2.141   | 16.223 |
| 344.279      | 5.816   | 10.003 | 6.704   | 5.299  | 1.686   | 10.498 | 3.048   | 10.585 | 3.387   | 10.585 |
| 778.904      | 12.891  | 4.644  | 5.666   | 6.238  | 2.584   | 6.982  | 7.847   | 4.253  | 7.455   | 4.957  |
| 964.079      | 11.752  | 5.082  | 7.442   | 4.786  | 4.415   | 4.147  | 8.657   | 3.863  | 10.503  | 3.544  |
| 1085.869     | 14.683  | 4.089  | 7.071   | 5.031  | 3.623   | 5.031  | 6.683   | 4.975  | 5.393   | 6.787  |
| 1112.074     | 16.019  | 3.754  | 7.481   | 4.762  | 4.576   | 4.005  | 7.397   | 4.505  | 6.138   | 5.988  |
| 1408.006     | 20.520  | 2.943  | 15.617  | 2.310  | 5.745   | 3.202  | 7.208   | 4.621  | 11.936  | 3.125  |

**Table S9.** The MFP and RPE rates of the PS-b-PEG copolymers blended with the nanostructured SeO<sub>2</sub> and BN particles.

| NC Label     | PBSNC1  |        | PBSNC2  |        | PBSNC3  |        | PBSNC4  |        |
|--------------|---------|--------|---------|--------|---------|--------|---------|--------|
| Energy (keV) | MFP(cm) | RPE(%) | MFP(cm) | RPE(%) | MFP(cm) | RPE(%) | MFP(cm) | RPE(%) |
| 121.782      | 2.765   | 17.293 | 1.454   | 14.690 | 1.076   | 22.334 | 1.310   | 22.334 |
| 344.279      | 11.507  | 4.460  | 3.697   | 6.057  | 3.837   | 6.843  | 4.397   | 7.251  |
| 778.904      | 11.264  | 4.554  | 3.965   | 5.659  | 4.409   | 5.982  | 5.016   | 6.386  |
| 964.079      | 12.602  | 4.080  | 4.733   | 4.764  | 5.832   | 4.557  | 6.605   | 4.888  |
| 1085.869     | 13.424  | 3.836  | 4.514   | 4.989  | 6.283   | 4.237  | 6.746   | 4.788  |
| 1112.074     | 17.119  | 3.020  | 4.735   | 4.762  | 6.873   | 3.880  | 7.993   | 4.056  |
| 1408.006     | 26.689  | 1.948  | 6.490   | 3.497  | 15.986  | 1.687  | 13.668  | 2.393  |
| NC Label     | PBSNC5  |        | PBSNC6  |        | PBSNC7  |        | PBSNC8  |        |
| Energy (keV) | MFP(cm) | RPE(%) | MFP(cm) | RPE(%) | MFP(cm) | RPE(%) | MFP(cm) | RPE(%) |
| 121.782      | 3.841   | 10.894 | 2.035   | 16.341 | 1.322   | 19.388 | 1.873   | 19.744 |
| 344.279      | 4.544   | 9.290  | 3.297   | 10.425 | 5.602   | 4.960  | 5.936   | 6.705  |
| 778.904      | 7.460   | 5.766  | 7.900   | 4.491  | 5.875   | 4.736  | 5.811   | 6.845  |

| 964.079      | 8.438   | 5.115  | 7.864   | 4.511  | 10.616  | 2.649  | 7.150   | 5.600  |
|--------------|---------|--------|---------|--------|---------|--------|---------|--------|
| 1085.869     | 8.471   | 5.095  | 7.618   | 4.653  | 5.752   | 4.834  | 8.315   | 4.834  |
| 1112.074     | 8.757   | 4.933  | 7.761   | 4.570  | 9.868   | 2.847  | 10.944  | 3.695  |
| 1408.006     | 11.254  | 3.860  | 11.259  | 3.173  | 24.297  | 1.166  | 13.169  | 3.080  |
| NC Label     | PBSNC9  |        | PBSNC10 |        | PBSNC11 |        | PBSNC12 |        |
| Energy (keV) | MFP(cm) | RPE(%) | MFP(cm) | RPE(%) | MFP(cm) | RPE(%) | MFP(cm) | RPE(%) |
| 121.782      | 5.368   | 9.890  | 1.216   | 16.827 | 1.028   | 21.669 | 1.237   | 21.986 |
| 344.279      | 8.102   | 6.667  | 2.087   | 10.178 | 5.123   | 4.781  | 2.388   | 12.066 |
| 778.904      | 9.592   | 5.661  | 4.260   | 5.122  | 5.146   | 4.761  | 3.553   | 8.279  |
| 964.079      | 12.535  | 4.362  | 4.640   | 4.713  | 6.133   | 4.010  | 5.169   | 5.766  |
| 1085.869     | 11.480  | 4.753  | 4.754   | 4.603  | 4.927   | 4.967  | 5.003   | 5.952  |
| 1112.074     | 12.554  | 4.355  | 5.966   | 3.685  | 5.109   | 4.794  | 5.242   | 5.688  |
| 1408.006     | 14.589  | 3.759  | 10.392  | 2.132  | 13.091  | 1.899  | 8.081   | 3.728  |

### S3. Characterization Examinations of Polymer-Nanostructured Particles Based Nano-composites via SEM System

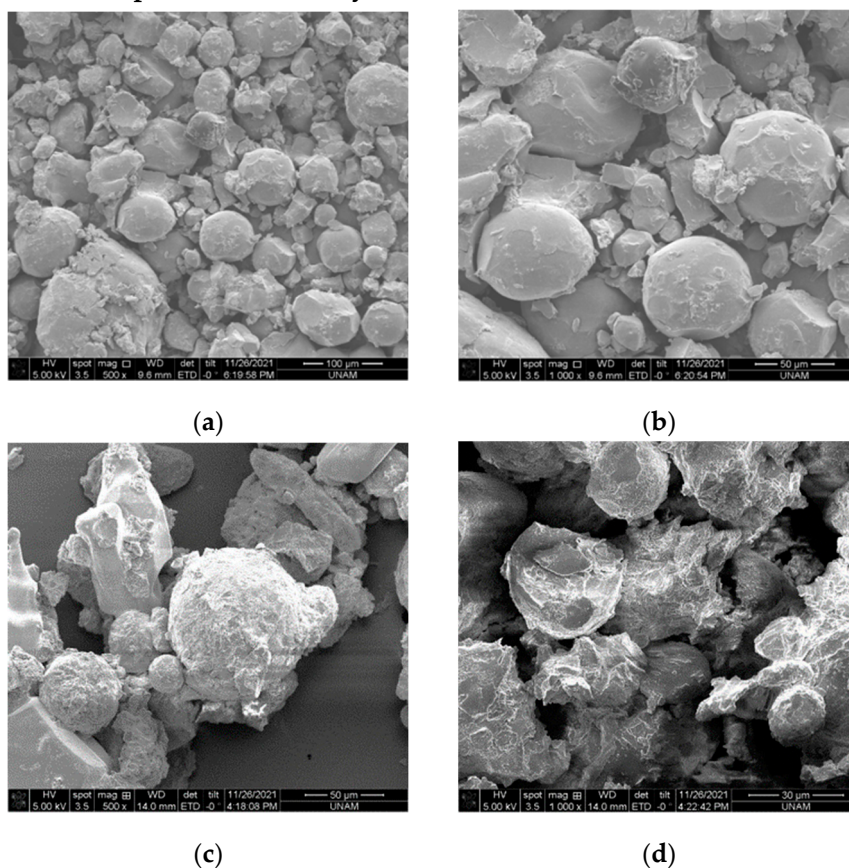

**Figure S1.** SEM images of PSNC1 nanocomposite (a-b) and PSNC4 (c-d) nanocomposites.



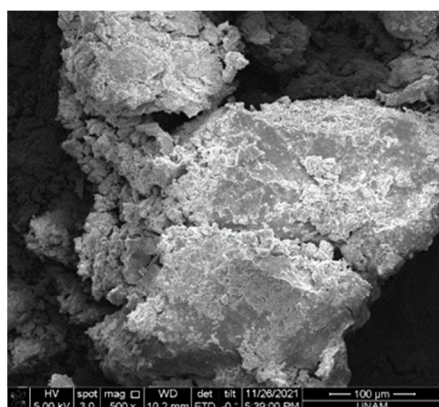

(a)

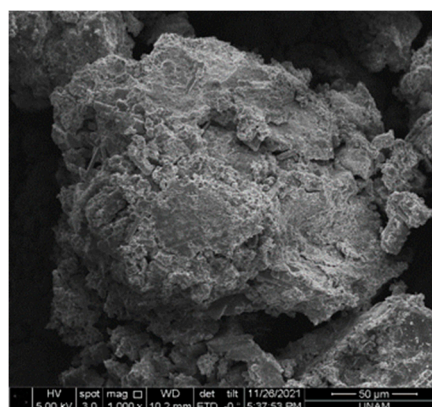

(b)

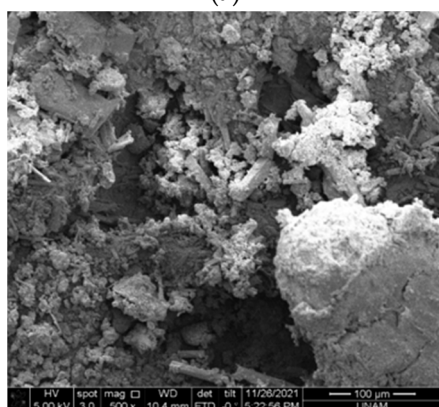

(c)

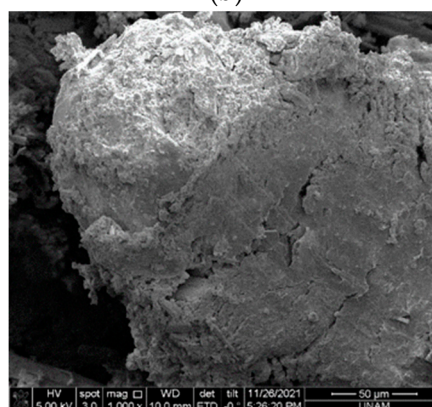

(d)

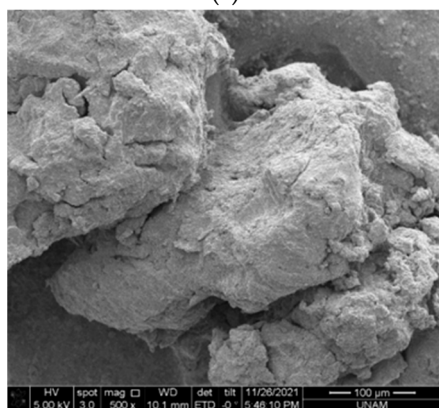

(e)

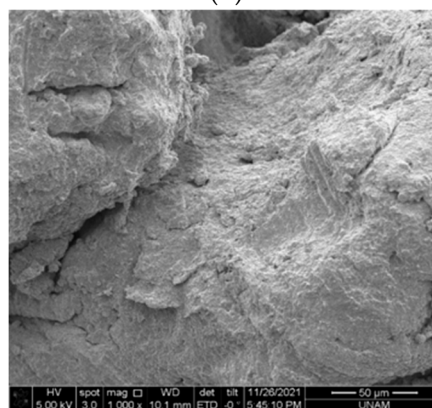

(f)

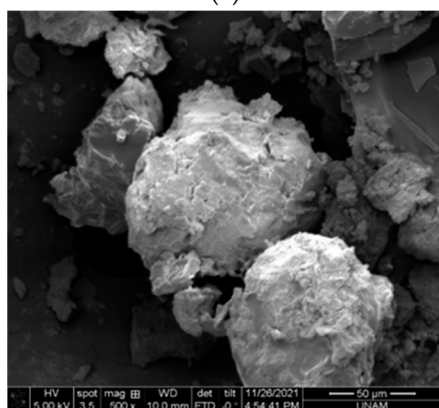

(g)

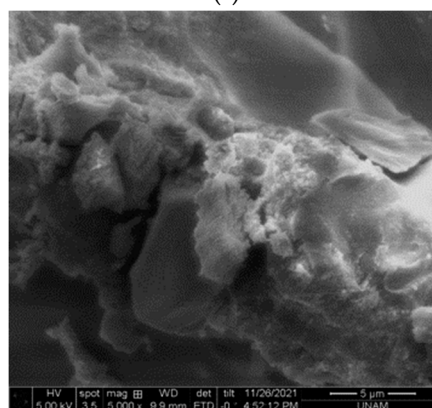

(h)



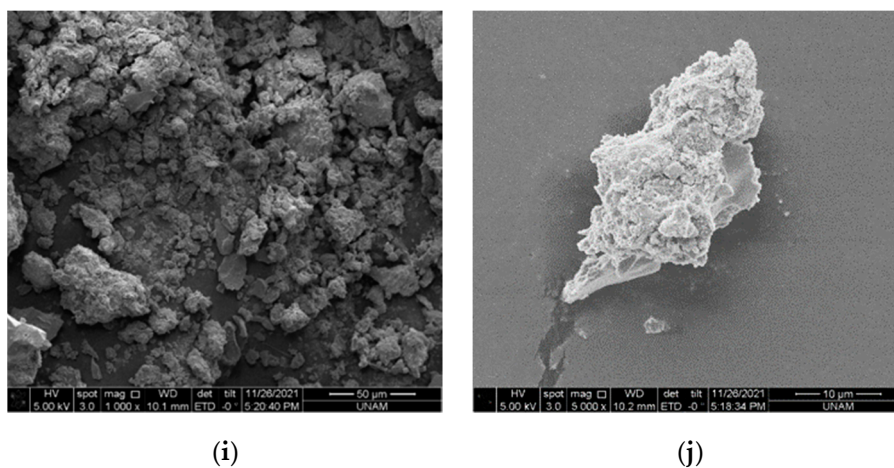

**Figure S2.** SEM images of PSNC9 (a-b), PSNC14 (c-d), PBSNC2 (e-f), PBSNC6 (g-h), and PBSNC10 (i-j) nanocomposites.
